# Supplementary material for: Crystal Structure and Concentration-Driven Phase Transitions in Lu(1−x)ScxFeO3 (0 ≤ x ≤ 1) Prepared by the Sol–Gel Method
Source: MDPI journal article supplement (doi:10.3390/ma15031048), 2022-01-29
Supplement: s1 [file s1]

# Supplementary data

## Crystal structure and concentration driven phase transitions in $\text{Lu}_{1-x}\text{Sc}_x\text{FeO}_3$ ( $0 \leq x \leq 1$ ) prepared by sol-gel method

A. Pakalniškis<sup>1,\*</sup>, D. O. Alikin<sup>2</sup>, A.P. Turygin<sup>2</sup>, A.L. Zhaludkevich<sup>3</sup>, M.V. Silibin<sup>4,5</sup>,  
D.V. Zhaludkevich<sup>3</sup>, G. Niaura<sup>6</sup>, A. Zarkov<sup>1</sup>, R. Skaudžius<sup>1</sup>, D. V. Karpinsky<sup>3,7</sup>, A. Kareiva<sup>1</sup>

<sup>1</sup> Institute of Chemistry, Vilnius University, Naugarduko 24, LT-03225 Vilnius, Lithuania

<sup>2</sup> School of Natural Sciences and Mathematics, Ural Federal University, Ekaterinburg, Russia

<sup>3</sup> Scientific-Practical Materials Research Centre of NAS of Belarus, 220072 Minsk, Belarus

<sup>4</sup> National Research University of Electronic Technology "MIET", 124498 Moscow, Russia

<sup>5</sup> Institute for Bionic Technologies and Engineering, I.M. Sechenov First Moscow State Medical University, Moscow 119991, Russia

<sup>6</sup> Department of Organic Chemistry, Center for Physical Sciences and Technology (FTMC), Sauletekio Ave. 3, LT-10257, Vilnius, Lithuania

<sup>7</sup> South Ural State University, av. Lenina, 76, 454080, Chelyabinsk, Russia

Corresponding author: A. Pakalniškis email: andrius.pakalniskis@chgf.vu.lt

Keywords: Phase transitions; structural phase stability;  $\text{LuFeO}_3$ ; X-ray diffraction; Solid solutions

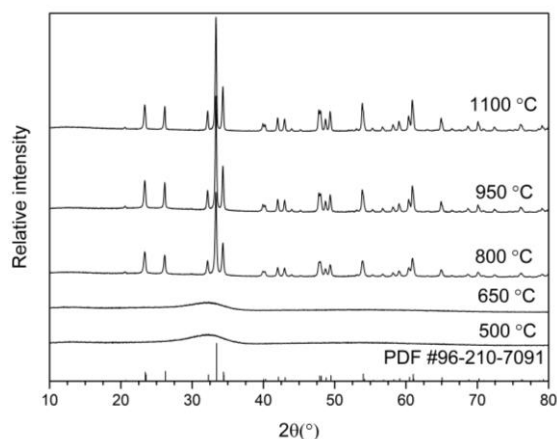

Figure S1. XRD patterns of  $\text{LuFeO}_3$  prepared at different sintering temperatures

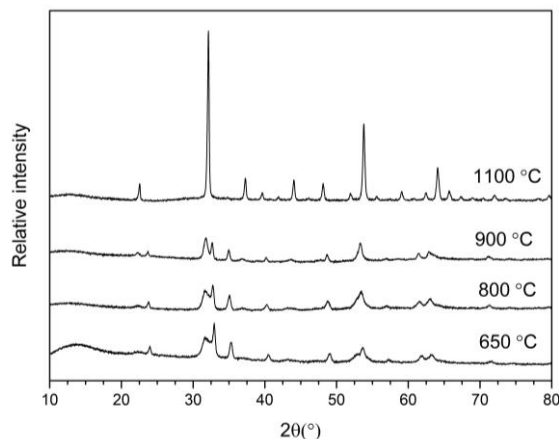

Figure S2. XRD patterns of  $\text{ScFeO}_3$  prepared at different sintering temperatures

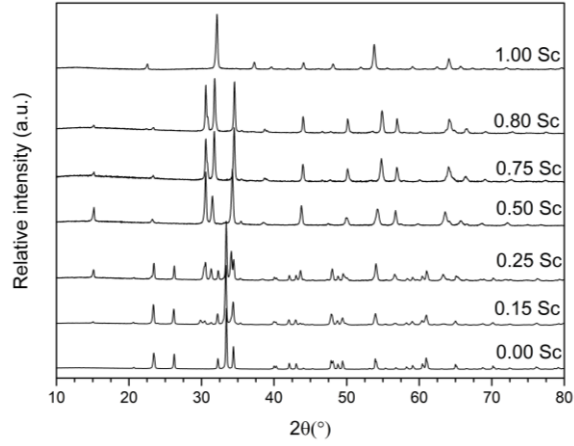

Figure S3. XRD patterns of  $\text{Lu}_{1-x}\text{Sc}_x\text{FeO}_3$  ( $0 \leq x \leq 1$ )

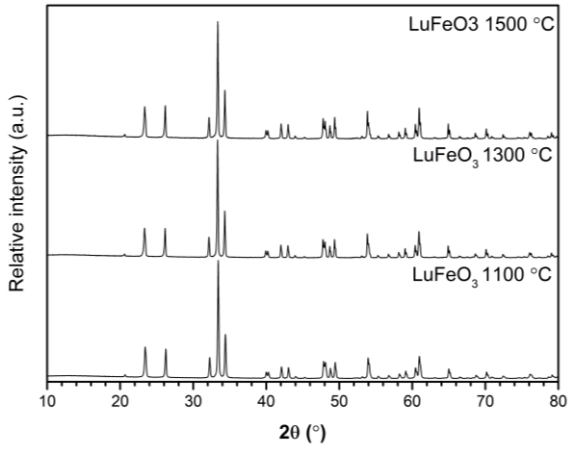

Figure S4. XRD patterns of  $\text{LuFeO}_3$  additionally calcinated at different temperatures

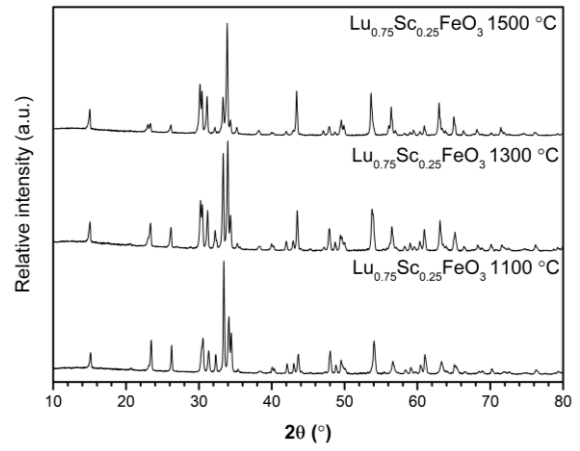

Figure S5. XRD patterns of  $\text{Lu}_{0.75}\text{Sc}_{0.25}\text{FeO}_3$  additionally calcinated at different temperatures

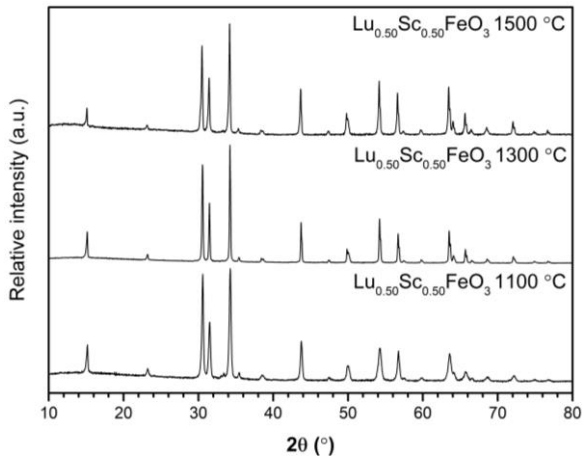

Figure S6. XRD patterns of  $\text{Lu}_{0.50}\text{Sc}_{0.50}\text{FeO}_3$  additionally calcinated at different temperatures

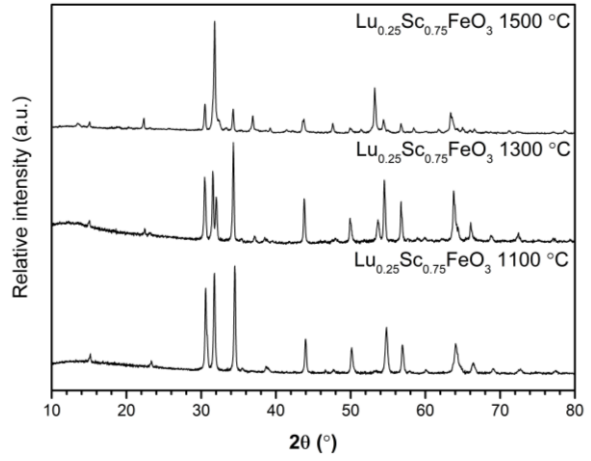

Figure S7. XRD patterns of  $\text{Lu}_{0.25}\text{Sc}_{0.75}\text{FeO}_3$  additionally calcinated at different temperatures

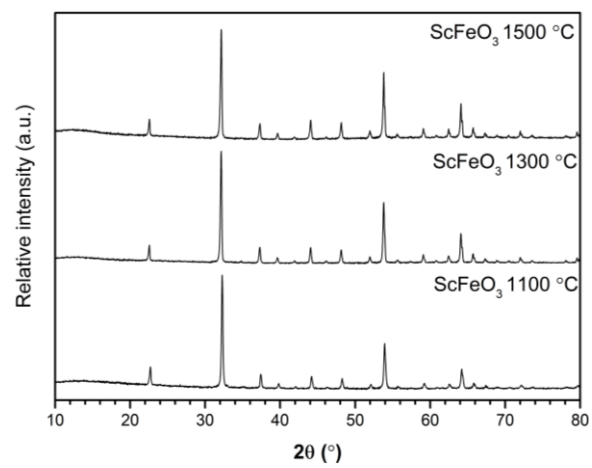

Figure S8. XRD patterns of ScFeO<sub>3</sub> additionally calcinated at different temperatures
